1 **Article Summary Line:** Active genomic surveillance of SARS-CoV-2 suspected cases from  
2 recent travelers reveals the circulation of the P1 variant of concern in Bahia state, Northeast  
3 Brazil.

4  
5 **Running Title:** Genomic surveillance of P.1 variant in Bahia state

6  
7 **Keywords:** SARS-CoV-2, P.1 variant, Genomic surveillance, Brazil

8  
9 **Title:** Early genomic detection of SARS-CoV-2 P.1 variant in Northeast Brazil

10  
11 **Authors:** Stephane Tosta\*, Marta Giovanetti\*, Vanessa Brandão Nardy, Luciana Reboredo de  
12 Oliveira da Silva, Marcela Kelly Astete Gómez, Jaqueline Gomes Lima, Cristiane Wanderley  
13 Cardoso, Tarcisio Oliveira Silva, Marcia São Pedro Leal de Souza, Pedro H. Presta Dia, Vagner  
14 Fonseca, José Lourenço, Luiz Carlos Junior Alcantara, Felicidade Pereira\*, Arabela Leal

15  
16 **Affiliations:** Laboratório de Genética Celular e Molecular, Instituto de Ciências Biológicas,  
17 Universidade Federal de Minas Gerais, Belo Horizonte, Minas Gerais, Brazil (S. Tosta, V.  
18 Fonseca, M. Giovanetti, L. Alcantara); Laboratório de Flavivírus, Instituto Oswaldo Cruz,  
19 Fundação Oswaldo Cruz, Rio de Janeiro, Brazil (M. Giovanetti, L. Alcantara); Coordenação  
20 Geral dos Laboratórios de Saúde Pública/Secretaria de Vigilância em Saúde, Ministério da  
21 Saúde, (CGLAB/SVS-MS) Brasília, Distrito Federal, Brazil (V. Fonseca); KwaZulu-Natal  
22 Research Innovation and Sequencing Platform (KRISP), School of Laboratory Medicine and  
23 Medical Sciences, College of Health Sciences, University of KwaZulu-Natal, Durban, South

24 Africa Department of Zoology (V. Fonseca); Centro e Informações Estratégicas de Vigilância  
25 em Saúde do estado da Bahia (CIEVS) (P. Dias), Secretaria Municipal de Saúde de Salvador (C.  
26 Cardoso); Diretoria de Vigilância Epidemiológica do Estado da Bahia (DIVEP) (M. Souza);  
27 Secretaria Municipal de Saúde de Irecê (T. Silva); University of Oxford, Oxford OX1 3PS, UK  
28 (J. Lourenço); Laboratório Central de Saúde Pública da Bahia – LACEN-BA, Salvador, Bahia,  
29 Brazil (S. Tosta, V. Nardy, L. Silva, , M. Gómez, J. Lima, F. Pereira, A. Leal).

30

31 \*These authors contributed equally to this article.

32

### 33 **Abstract**

34 Tracking the spread of SARS-CoV-2 variants of concern is crucial to inform public health efforts  
35 and control the ongoing pandemic. Here, we report genetic evidence for circulation of the P.1  
36 variant in Northeast Brazil. We advocate for increased active surveillance to ensure adequate  
37 control of this variant throughout the country.

38

### 39 **Text**

40 Since the emergence of the severe acute respiratory syndrome coronavirus-2 (SARS-  
41 CoV-2) in 2019, the combination between the unprecedented number of cases and more than  
42 500k genomes generated has allowed the identification of hundreds of circulating genetic  
43 variants during the pandemic (*1*). Currently, three variants (B.1.1.7 or VOC202012/01, B.1.351  
44 or 20H/501Y.V2 and P.1) carrying several mutations in the receptor-binding domain (RBD) of  
45 the spike (S) protein, raise concerns about their potential to shift the dynamics and public health  
46 impact of the pandemic (2-5). They appear potentially associated with (i) increased

47 transmissibility, (ii) propensity for re-infection, (iii) escape from neutralizing antibodies, and (iv)  
48 increased affinity for the human ACE2 receptor (6-8).

49 First identified in January 2021 in travelers from the Amazonas state (North of Brazil)  
50 who arrived in Japan, the P.1 variant (alias of B.1.1.28.1) (9), harbors a constellation of 17  
51 unique mutations, including three in the receptor binding domain of the spike protein (K417T,  
52 E484K, and N501Y). It thus immediately raised concerns to public health authorities over the  
53 risk of its unknown potential of faster spreading and/or worsening of coronavirus disease  
54 (COVID-19) clinical outcomes. In view of its rapid spread in Brazil and elsewhere (4,5,10) the  
55 public health authorities of the Bahia state (Northeast Brazil) conducted an active monitoring for  
56 a rapid detection of this variant in the state.

57 Here, we report genetic evidence of the circulation of the P.1 variant in Bahia, by  
58 generating 11 SARS-CoV-2 complete genomes from travelers returning from the Amazonas  
59 state (North of Brazil). In mid-January 2021, routine genomic surveillance in the Central  
60 Laboratory of Health of the Bahia state, started a massive screening of COVID-19 patients and  
61 their contacts reporting a travel history to/from the Amazonas state, resulting in eleven suspected  
62 SARS-CoV-2, P.1 infections. Viral RNA was extracted from nasopharyngeal swabs and tested  
63 for SARS-CoV-2 by multiplex real-time PCR using SARS-CoV-2 assay Allplex™ 2019-nCoV  
64 Assay (Seegene) and Charité: SARS-CoV2 (E/RP) (Biomanguinhos). Cycle threshold values  
65 (Cts) for the common target between the two assays, gene E, ranged from  $\approx 16$  to  $\approx 35$ . We next  
66 subjected the qRT-PCR–positive samples to viral genomic amplification and sequencing using  
67 the Ion GeneStudio™ S5 Plus Ion Torrent (Life Technologies, USA), according to the  
68 manufacturer’s instructions. Consensus sequences from the eleven positive tested samples were  
69 generated by *de novo* assembling using Genome Detective (<https://www.genomedetective.com/>)

70 (11). A total of 13,234,814 mapped reads were obtained, resulting in a sequencing mean depth of  
71 4824 and a coverage of 98%. The new whole genome sequences generated were assigned,  
72 according to the Pangolin (1) lineage classification, as the recently identified P.1 variant (alias of  
73 B.1.1.28.1). All patients had recently record travel from the city of Manaus in Amazonas back  
74 into the Bahia state. Four patients were from the same family and the other others had no other  
75 known connection between them. The data from the eleven patients are described in (**Table 1**).

76

77 We explored the genetic relationship of the newly sequenced P.1 genomes to those of  
78 other isolates by phylogenetic inference. To do so, we combined the eleven new isolates  
79 (Accession numbers EPI\_ISL\_1067728 - EPI\_ISL\_1067738) with all Brazilian SARS-CoV-2  
80 (n=1663) genomes, including recently released P.1 genomes (**Figure 1 panels A-B**) (4,5)  
81 available on GISAID (<https://www.gisaid.org/>) up to February 21st, 2021. Only genomes  
82 >29,000bp and <1% of ambiguities were considered (n=1663). Sequences were aligned using  
83 MAFFT (12) and submitted to IQ-TREE for maximum likelihood (ML) phylogenetic analysis  
84 (13).

85 Phylogenetic estimation strongly supported placement of the isolates from Bahia within  
86 the Brazilian P.1 clade (**Figure 1, panel A**) (SH-aLTR = 1.0). Our results further highlighted  
87 that most of our new isolates formed two well supported monophyletic clusters (**Figure 1 panel**  
88 **C**). One of those clusters (Cluster i), included samples from the capital city of Salvador, isolated  
89 from individuals from the same family of the eleven patients described here (BA49, 50, 51 and  
90 52) plus the sample BA57 (SH-aLTR = 1.0). And a second cluster (Cluster ii) which included  
91 samples BA53, 54 and 55 that were isolated from patients from the municipalities of João  
92 Dourado and Irecê (SH-aLTR = 1.0). Moreover, samples BA56 and BA58 and BA59 appeared to

93 be interspersed among P.1 strains from the North and Southeast Brazil. By combining all the P.1  
94 strains already available from distinct Brazilian regions (**Figure 1 panel B, C**) our analysis  
95 further revealed that this variant was already detected in the majority of Brazilian regions  
96 (starting from the North to Midwest, Northeast, Southeast and South Brazil) highlighting the  
97 high connectivity of the country and reinforcing the need of active monitoring to follow the local  
98 real-time spread of this new variant of international concern. Finally, among the eleven new  
99 genomes, we also identified lineage-specific mutations, including the ones of international  
100 concern among the RDB domain: K417T (22812A>C), E484K (23012G>A) and the N501Y  
101 (23063A>T) (**Figure 1, panel D**).

102 This report describes the early detection of the SARS-CoV-2 P.1 variant in the Northeast  
103 of Brazil (Bahia state) and provides evidence regarding the P.1 circulation across all Brazilian  
104 macro-regions that would have occurred within the past two months. The P.1 variant is now  
105 known to have emerged in the Amazonas state, but was first detected in travelers arriving in  
106 Japan from Brazil. The latter is a testimony for the currently scarce genomic surveillance in  
107 Brazil, which has failed to detect the variant before it became a public health emergency in the  
108 Amazonas state. Moreover, the eleven individuals here described to carry the P.1 variant in the  
109 Bahia state were only detected after a unique active screening initiative that focused on travelers  
110 and their recent contacts. This case study should serve as an example of the effectiveness of  
111 active surveillance to monitor the importation of genetic variants of importance for public health.  
112 Since such initiatives are not only critical to monitor the ongoing spread of known variants but  
113 are also necessary to detect the possible emergence of new ones in the near future, continual and  
114 revamped investment is needed and will be necessary for adequate public health policy in Brazil.

115

116

## 117 **Acknowledgments**

118 This work was financed by Laboratório Central de Saúde Pública da Bahia (LACEN-BA) and  
119 Secretaria da Saúde do Estado da Bahia (SESAB) and supported by Pan American Health  
120 Organization PAHO/WHO. We also thank Centro e Informações Estratégicas de Vigilância em  
121 Saúde (CIEVS) in the municipality of Salvador, Bahia. ST is supported by the Coordenação de  
122 Aperfeiçoamento de Pessoal de Nível Superior – Brasil (CAPES) – Finance Code 001. MG is  
123 supported by Fundação de Amparo à Pesquisa do Estado do Rio de Janeiro (FAPERJ). JL is  
124 supported by a lectureship from the Department of Zoology, University of Oxford. We also  
125 would like to thank all the authors who have kindly deposited and shared genome data on  
126 GISAID. A table with genome sequence acknowledgments can be found in **Supplementary**  
127 **Table 1.**

128

## 129 **Author Bio**

130 MSc. Fraga is a PhD student at the Federal University of Minas Gerais, Southeast Brazil. Her  
131 research focuses on the implementation of next generation sequencing techniques to track the  
132 spread of emerging and re-emerging viral pathogens.

133

## 134 **Ethical Statement**

135 This research was approved by the Ethics Review Committee of the Federal University of Minas  
136 Gerais (CEP/CAAE: 32912820.6.1001.5149 approval number).

137

## 138 **Data Sharing**

139 Newly generated SARS-CoV-2 sequences have been deposited in GISAID under accession  
140 numbers EPI\_ISL\_1067728 to EPI\_ISL\_1067738.

#### 141 **Declaration of interests**

142 The authors declare no competing interests.

143

#### 144 **AUTHOR CONTRIBUTIONS**

145 **Conception and design:** SFT, MG, FPM, and AL; **Data collection:** SFT, MG, FPM, CC, TS,  
146 PD, MS; **Investigations:** ST, LS, VN, MKAG, JGL, CC, MG, VF, JL; **Data Analysis:** ST, MG,  
147 VF; **Draft Preparation:** ST, MG, JL, FPM, and AL; **Revision:** LCJA, SFT, MG, FPM, CC, TS,  
148 PD, MS.

149

#### 150 **References**

- 151 1. O'Toole Á, Scher E, Anthony Underwood, Ben Jackson, Verity Hill, JT McCrone, Chris  
152 Ruis, Khali Abu-Dahab, Ben Taylor, Corin Yeats, Louis du Plessis, David Aanensen,  
153 Eddie Holmes, Oliver Pybus, Andrew Rambaut. Pangolin: lineage assignment in an  
154 emerging pandemic as an epidemiological tool. ([github.com/cov-lineages/pangolin](https://github.com/cov-lineages/pangolin))
- 155 2. Rambaut A, Loman N, Pybus O, et al. Preliminary genomic characterisation of an  
156 emergent SARS-CoV-2 lineage in the UK defined by a novel set of spike mutations.  
157 [https://virological.org/t/preliminary-genomic-characterisation-of-an-emergent-sars-cov-2-](https://virological.org/t/preliminary-genomic-characterisation-of-an-emergent-sars-cov-2-lineage-in-the-uk-defined-by-a-novel-set-of-spike-mutations/563)  
158 [lineage-in-the-uk-defined-by-a-novel-set-of-spike-mutations/563](https://virological.org/t/preliminary-genomic-characterisation-of-an-emergent-sars-cov-2-lineage-in-the-uk-defined-by-a-novel-set-of-spike-mutations/563). (accessed Dec 21,  
159 2020).
- 160 3. Tegally H, Wilkinson E, Giovanetti M, et al. Emergence and rapid spread of a new severe  
161 acute respiratory syndrome-related coronavirus 2 (SARS-CoV-2) lineage with multiple

- 162 spike mutations in South Africa. medRxiv 2020.12.21.20248640 (Preprint); doi:  
163 <https://doi.org/10.1101/2020.12.21.20248640>.
- 164 4. Faria NR, Claro IM, Candido D, et al. Genomic characterisation of an emergent SARS-  
165 CoV-2 lineage in Manaus: preliminary findings. *Virological*. Date accessed: February 24,  
166 2021. [https://virological.org/t/genomic-characterisation-of-an-emergent-sars-cov-2-](https://virological.org/t/genomic-characterisation-of-an-emergent-sars-cov-2-lineage-in-manaus-preliminary-findings/586)  
167 [lineage-in-manaus-preliminary-findings/586](https://virological.org/t/genomic-characterisation-of-an-emergent-sars-cov-2-lineage-in-manaus-preliminary-findings/586)
- 168 5. Rezende, Paola. “Phylogenetic Relationship of SARS-CoV-2 Sequences from Amazonas  
169 with Emerging Brazilian Variants Harboring Mutations E484K and N501Y in the Spike  
170 Protein.” *Virological*, 11 Jan. 2021, [virological.org/t/phylogenetic-relationship-of-sars-](https://virological.org/t/phylogenetic-relationship-of-sars-cov-2-sequences-from-amazonas-with-emerging-brazilian-variants-harboring-mutations-e484k-and-n501y-in-the-spike-protein/585)  
171 [cov-2-sequences-from-amazonas-with-emerging-brazilian-variants-harboring-mutations-](https://virological.org/t/phylogenetic-relationship-of-sars-cov-2-sequences-from-amazonas-with-emerging-brazilian-variants-harboring-mutations-e484k-and-n501y-in-the-spike-protein/585)  
172 [e484k-and-n501y-in-the-spike-protein/585](https://virological.org/t/phylogenetic-relationship-of-sars-cov-2-sequences-from-amazonas-with-emerging-brazilian-variants-harboring-mutations-e484k-and-n501y-in-the-spike-protein/585).
- 173 6. “Emerging SARS-CoV-2 Variants.” Centers for Disease Control and Prevention, Centers  
174 for Disease Control and Prevention, [www.cdc.gov/coronavirus/2019-ncov/more/science-](https://www.cdc.gov/coronavirus/2019-ncov/more/science-and-research/scientific-brief-emerging-variants.html)  
175 [and-research/scientific-brief-emerging-variants.html](https://www.cdc.gov/coronavirus/2019-ncov/more/science-and-research/scientific-brief-emerging-variants.html).
- 176 7. Vasques Nonaka CK, Franco MM, Gräf T, de Lorenzo Barcia CA, de Ávila Mendonça  
177 RN, de Sousa KAF, et al. Genomic evidence of SARS-CoV-2 reinfection involving  
178 E484K spike mutation, Brazil. *Emerg Infect Dis*. 2021 May
- 179 8. Weisblum Y, Schmidt F, Zhang F, et al. Escape from neutralizing antibodies by SARS-  
180 CoV-2 spike protein variants. *Elife* 2020; 9:3-10.
- 181 9. National Institute of Infectious Diseases, Japan. (2021, January 12.) Brief report: New  
182 Variant Strain of SARS-CoV-2 Identified in Travelers from Brazil [Press release].  
183 Retrieved from [https://www.niid.go.jp/niid/en/2019-ncov-e/10108-covid19-33-](https://www.niid.go.jp/niid/en/2019-ncov-e/10108-covid19-33-en.htmlexternal)  
184 [en.htmlexternal](https://www.niid.go.jp/niid/en/2019-ncov-e/10108-covid19-33-en.htmlexternal)



- 185 10. Pangolin: lineage assignment in an emerging pandemic as an epidemiological tool  
186 ([https://cov-lineages.org/global\\_report\\_P.1.html](https://cov-lineages.org/global_report_P.1.html))
- 187 11. Vilsker, M., Moosa, Y., Nooij, S., Fonseca, V., Ghysens, Y., Dumon, K., ... & de  
188 Oliveira, T. (2019). Genome Detective: an automated system for virus identification from  
189 high-throughput sequencing data. *Bioinformatics*, 35(5), 871-873.
- 190 12. Nakamura, T., Yamada, K. D., Tomii, K. & Katoh, K. Parallelization of MAFFT for  
191 large-scale multiple sequence alignments. *Bioinformatics*. 2018; 34:2490–2492.
- 192 13. Nguyen, L.-T., Schmidt, H. A., von Haeseler, A. & Minh, B. Q. IQ-TREE: A Fast and  
193 Effective Stochastic Algorithm for Estimating Maximum-Likelihood Phylogenies. *Mol*  
194 *Biol Evol*. 2015; 32:268–274.

195

196 **Address for correspondence:** Luiz Carlos Junior Alcantara, PhD, Oswaldo Cruz  
197 Foundation, [luiz.alcantara@ioc.fiocruz.br](mailto:luiz.alcantara@ioc.fiocruz.br); Marta Giovanetti, PhD, Oswaldo Cruz  
198 Foundation, [giovanetti.marta@gmail.com](mailto:giovanetti.marta@gmail.com); Felicidade Mota Pereira, Central Laboratory of  
199 Health of Bahia State [felicidade.pereira@saude.ba.gov.br](mailto:felicidade.pereira@saude.ba.gov.br); Arabela Leal, Central Laboratory  
200 of Health of Bahia State, [arabelaleal@gmail.com](mailto:arabelaleal@gmail.com) .

201

202 **Figure 1. Genomic detection of the SARS-CoV-2 P.1 variant of concern in Bahia state,**  
203 **Northeast Brazil.** a) Maximum likelihood (ML) phylogenetic tree including the 11 new isolates  
204 obtained in this study plus n=1663 SARS-CoV-2 Brazilian strains collected up to February 21st,  
205 2021. b) Map of Brazil showing the number of P.1 SARS-CoV-2 sequences available by region  
206 and state. North region (blue): AM=Amazonas state, RR=Roraima state and RO= Rondônia  
207 state; Midwest region (dark green): GO=Goiás state; Southeast region (lilac): SP=São Paulo and  
208 South region: SC (light green): Santa Catarina state and RS=Rio Grande do Sul state and  
209 Northeast region (red): BA=Bahia state. c) Representation of the zoom of the Brazilian P.1

210 clade. Branch support (SH-aLTR >0.8) is shown at key nodes. d) Variant maps of the P.1  
211 lineage-defining-mutations were mapped against the SARS-CoV-2 genome structure. Most  
212 common mutations defined as mutations present in more than 90% of the genomes in that group.  
213 Mutations of international concern: i) K417T (22812A>C); ii) E484K (23012G>A) and iii)  
214 N501Y (23063A>T), among the RDB domain are highlighted in red.

215

216

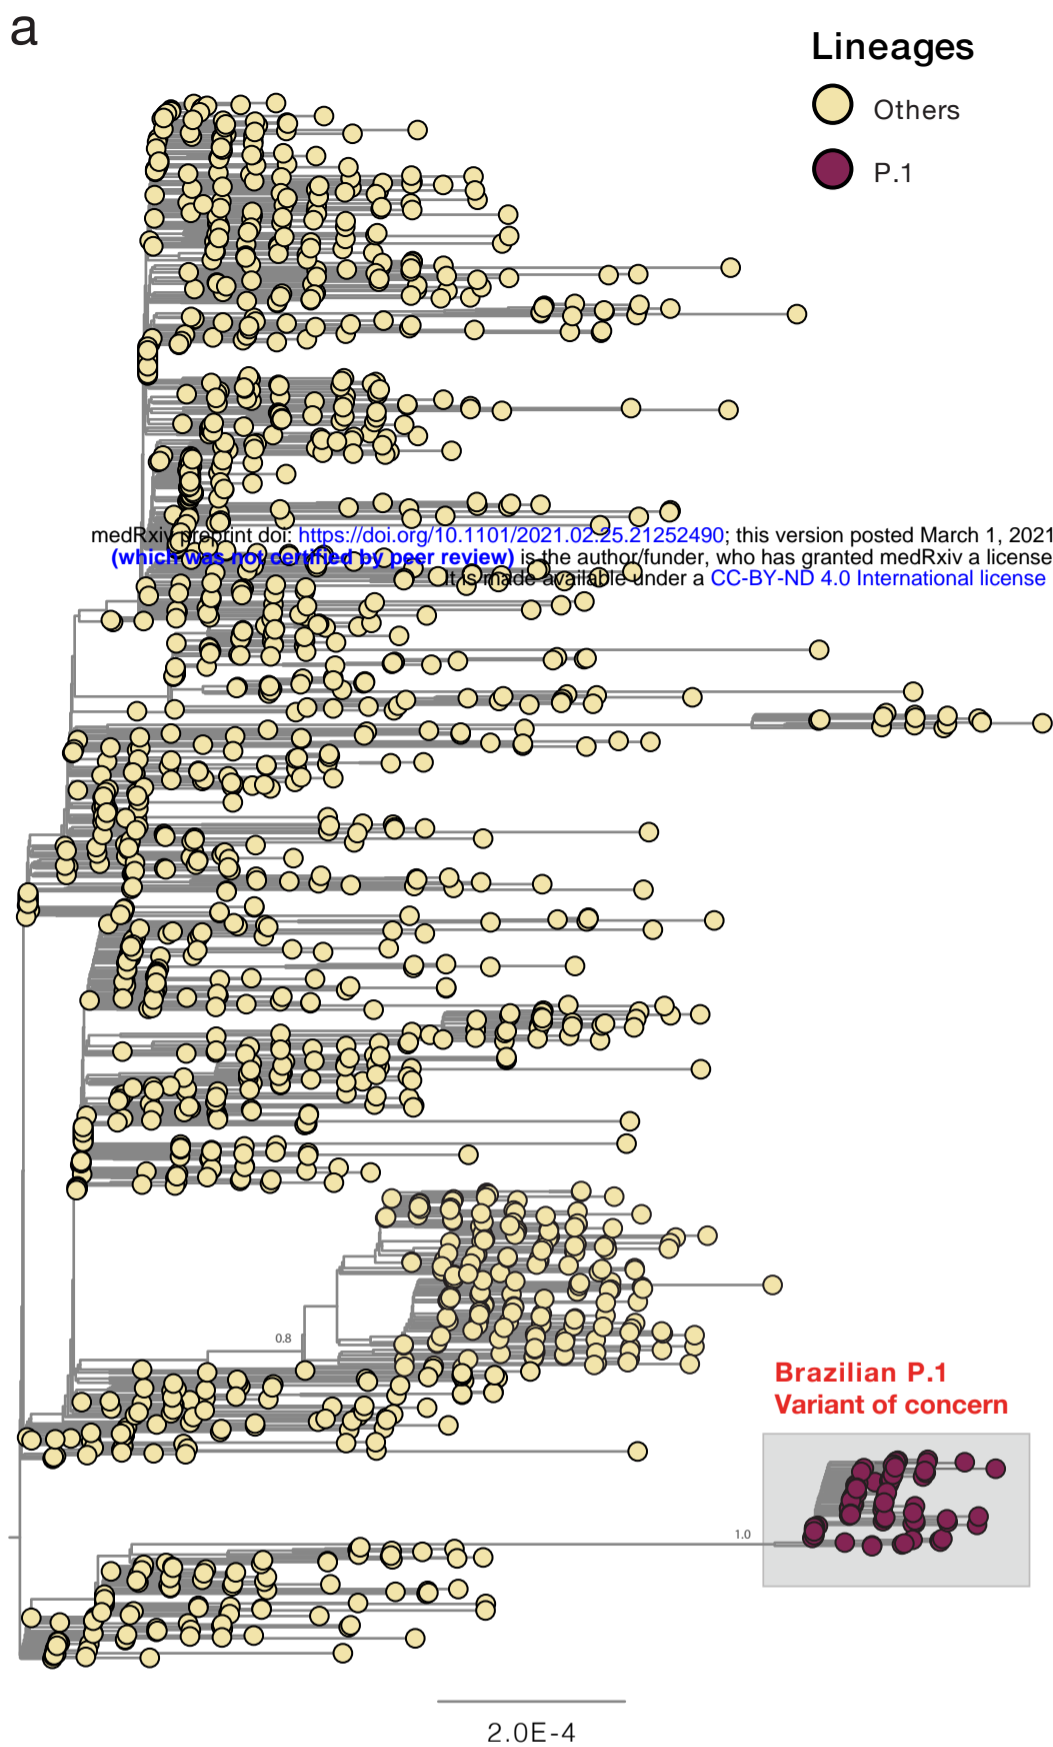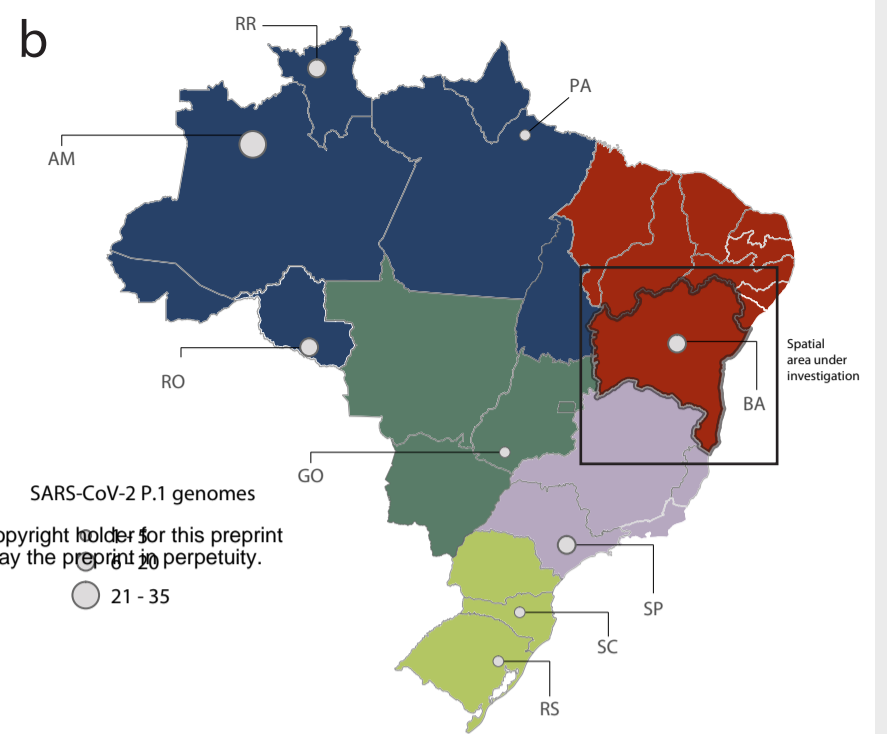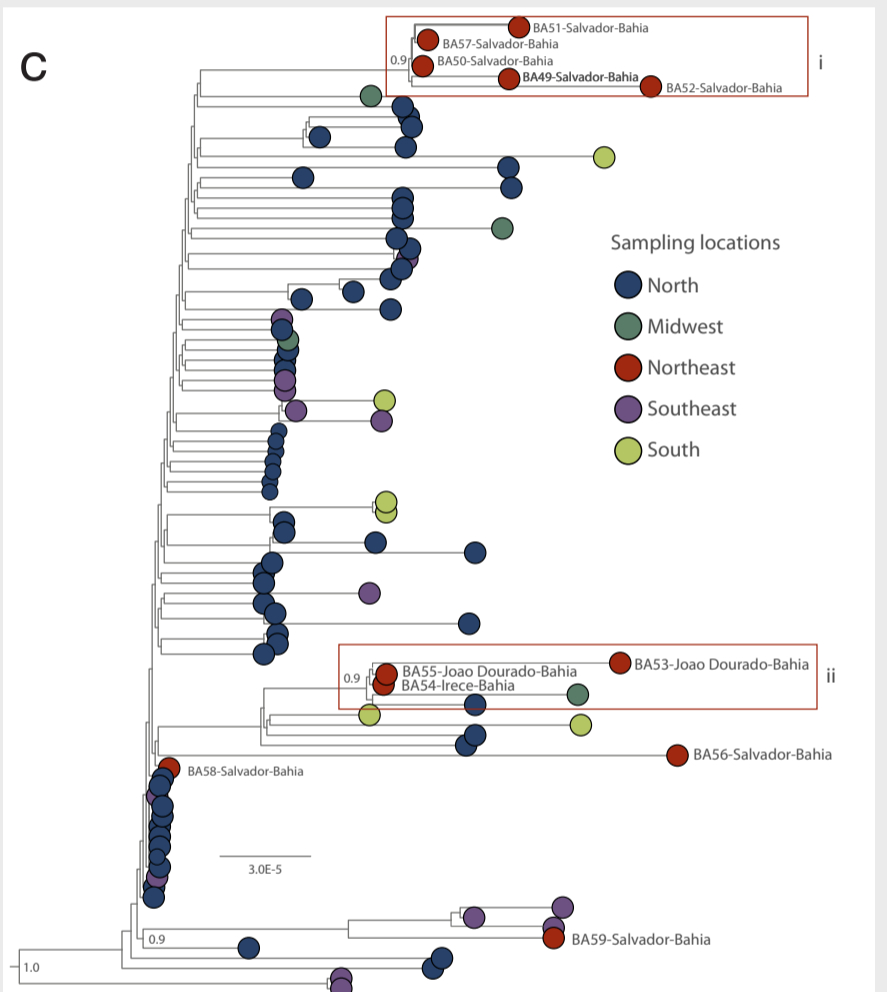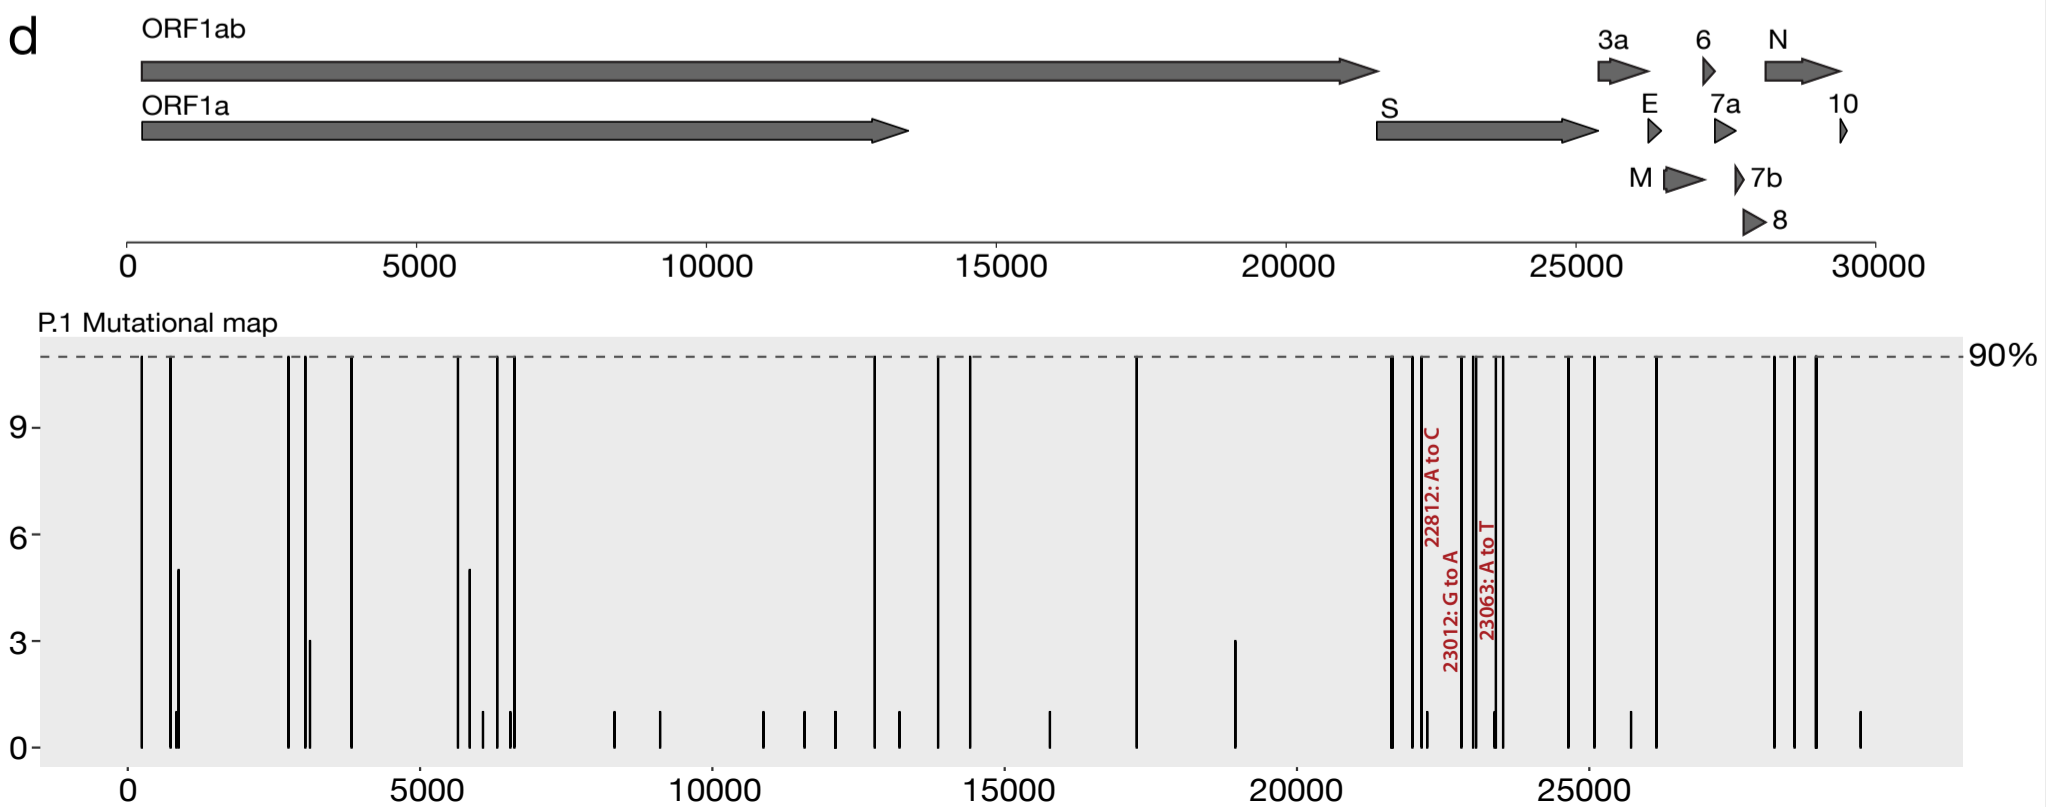

**Table 1.** Information from patients with travel history from Manaus, Amazonas to state of Bahia.

| GISAID ID       | ID                 | Requisition number date | Sample number | First day of symptoms | Colection Date | Sex | Age | Municipality | Cycle threshold (ct)                                     | Reads   | Coverage | Depth of Coverage | Identity NT | Identity AA |
|-----------------|--------------------|-------------------------|---------------|-----------------------|----------------|-----|-----|--------------|----------------------------------------------------------|---------|----------|-------------------|-------------|-------------|
| EPI_ISL_1067737 | BA49 <sup>1</sup>  | 210293001346            | 290601061     | none                  | 26/01/21       | M   | 7   | Salvador     | CI -16.858<br>E - 18.197<br>N - 20.885<br>RdRp -26.591   | 1659219 | 99.8     | 10179.3           | 100         | 99.9        |
| EPI_ISL_1067730 | BA50 <sup>1</sup>  | 210293001349            | 290601087     | 11/01/21              | 26/01/21       | F   | 31  | Salvador     | CI -28.754<br>E - 25.728<br>N - 25.672<br>RdRp - 28.469  | 594545  | 99.8     | 3706.8            | 99.9        | 99.9        |
| EPI_ISL_1067738 | BA51 <sup>1</sup>  | 210173000145            | 290600024     | 11/01/21              | 26/01/21       | M   | 66  | Salvador     | CI -27.016<br>E - 24.909<br>N - 23.841<br>RdRp - 25.642  | 412507  | 82.2     | 2869              | 89.9        | 88.7        |
| EPI_ISL_1067731 | BA52 <sup>1</sup>  | 210293001345            | 290601051     | 12/01/21              | 26/01/21       | F   | 37  | Salvador     | CI - 27.505<br>E - 24.558<br>N - 25.565<br>RdRp -26.856  | 1047634 | 99.2     | 6779              | 99.9        | 99.8        |
| EPI_ISL_1067735 | BA 56 <sup>1</sup> | 210174000203            | 290590503     | none                  | 16/01/21       | M   | 37  | Salvador     | CI - 25.285<br>E - 24.953<br>N - 25.789<br>RdRp - 26.624 | 862894  | 99.8     | 5438.3            | 100         | 99.9        |
| EPI_ISL_1067729 | BA 54              | 212121000810            | 290591002     | 12/01/21              | 23/01/21       | F   | 56  | Irecê        | CI -15.407<br>E -16.941<br>N - 16.808<br>RdRp -27.278    | 625085  | 99.8     | 3982.5            | 100         | 99.9        |
| EPI_ISL_1067734 | BA 55              | 212114000043            | 290591058     | 09/01/21              | 23/01/21       | M   | 52  | João Dourado | CI - 27.088<br>E - 22.326<br>N - 23.723<br>RdRp - 24.493 | 1848679 | 99.8     | 11278.1           | 100         | 99.9        |
| EPI_ISL_1067733 | BA 53              | 212114000042            | 290591052     | 23/01/21              | 23/01/21       | M   | 19  | João Dourado | E - 22.975<br>RP - 26.680                                | 1131609 | 99.8     | 6979.9            | 99.9        | 99.9        |
| EPI_ISL_1067736 | BA57               | None                    | SRH-01        | None                  | 23/01/21       | M   | 42  | Salvador     | CI - 39.527<br>E -17.289<br>N - 18.974<br>RdRp -19.226   | 1416051 | 99.8     | 8970.8            | 99.9        | 99.9        |
| EPI_ISL_1067728 | BA58               | None                    | SRH-02        | None                  | 08/01/21       | F   | 53  | Salvador     | CI - 27.812<br>E - 29.098<br>N - 29.766<br>RdRp - 30.580 | 2343392 | 98       | 14635.7           | 99.8        | 99.6        |
| EPI_ISL_1067732 | BA59               | None                    | SRH-03        | None                  | 18/01/21       | M   | 57  | Salvador     | CI - 26.759<br>E - 35.728<br>N - 32.585<br>RdRp - 33.041 | 1293199 | 99.8     | 8105.2            | 100         | 99.9        |

1 - Patients from the same family
